# Supplementary material
Source: bioRxiv or medRxiv preprint supplement (https://www.medrxiv.org/highwire/filestream/75206/field_highwire_adjunct_files/0/2020.04.02.20046375-1.pdf)
Supplement: Supplementary file [file 2020.04.02.20046375-1.pdf]

# Modeling the COVID-19 outbreaks and the effectiveness of the containment measures adopted across countries (Supplementary Material)

Edward De Brouwer<sup>1</sup>, Daniele Raimondi<sup>1</sup>, and Yves Moreau<sup>1</sup>

<sup>1</sup>ESAT-STADIUS, KU Leuven, 3001 Leuven, Belgium

COVID-19 | epidemic modelling | inference of basic reproduction ratio | SARS-CoV-2 |  
Correspondence: [yves.moreau@kuleuven.be](mailto:yves.moreau@kuleuven.be)

## Supplementary Note 1: Supplementary Figures

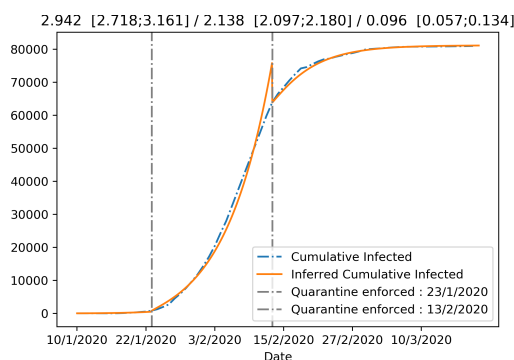

**Fig. 1.** Figure showing the fit of the SEIR model with  $\beta$  allowed to change after the introduction of the increasingly strict lockdown measures. Piecewise inference.

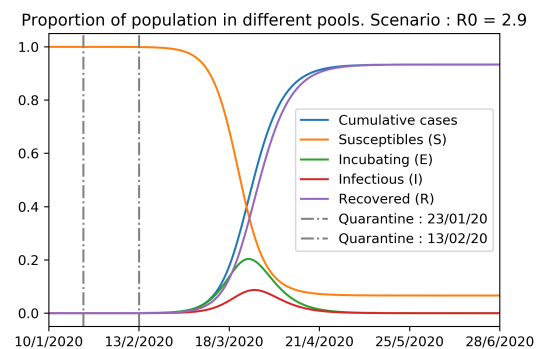

**Fig. 3.** Figure showing the fit of the SEIR model with  $\beta$  allowed to change after the introduction of the increasingly strict lockdown measures. Piecewise inference.

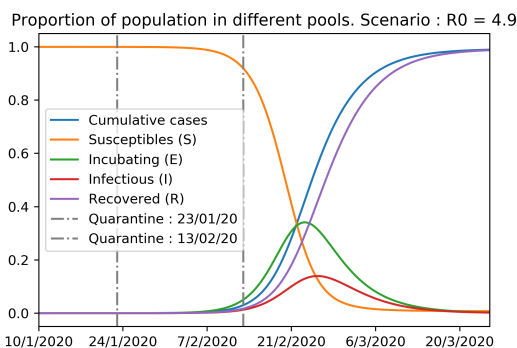

**Fig. 2.** Figure showing the fit of the SEIR model with  $\beta$  allowed to change after the introduction of the increasingly strict lockdown measures. Piecewise inference.

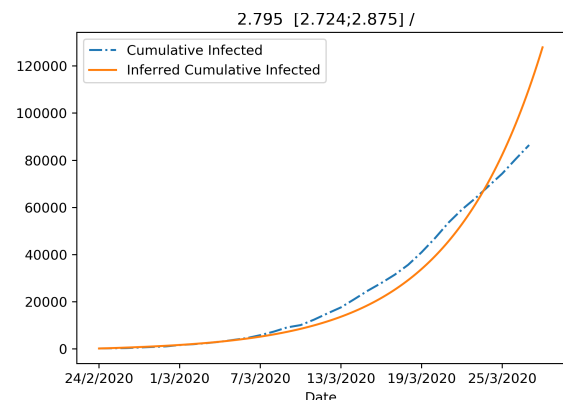

**Fig. 4.** Figure showing the fit of the SEIR model with no Quarantine (no changes in betas allowed).

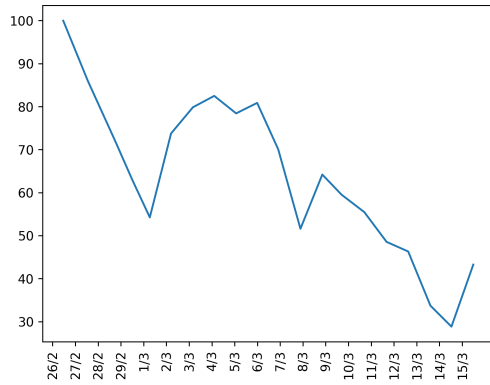

**Fig. 5.** In this plot we show, for illustrative purposes, a reproduction of the data showed by the Regione Lombardia regarding the movements of people during the lockdown, as evinced from anonymized cell-phone trackings. The data show a general decreasing trend of movements after the outbreak.

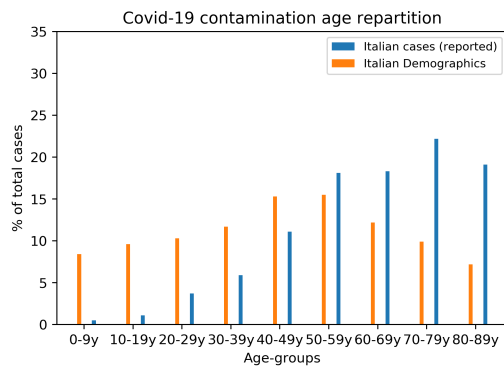

**Fig. 6.** Demographics age repartition of Italy along with the age distribution of reported cases.
